# Supplementary material for: Synthesis and characterization of bis(pyrazolyl)borate Ni(ii) complexes: ligand rearrangement and transformation
Source: Royal Society of Chemistry journal article supplement (doi:10.1039/c9dt02287b), 2019-01-01
Supplement: c9dt02287b1.pdf [file c9dt02287b1.pdf]

## Supporting Information

### **Syntheses and characterization of bis(pyrazolyl)borate Ni(II) complexes: ligand rearrangement and transformation**

Qianyi Zhao,<sup>\*a</sup> Xin-Ting Guan,<sup>a</sup> Ting Dou,<sup>a</sup> Hou-Ji Cao,<sup>a</sup> Na-Na Ma,<sup>a</sup> Ting Xu,<sup>a</sup> Peng-Hui Gao,<sup>a</sup> Xiao-Hua Kong,<sup>a</sup> Jie Zhang<sup>a</sup> and Xuenian Chen<sup>\*a,b</sup>

<sup>a</sup>*School of Chemistry and Chemical Engineering, Henan Key Laboratory of Boron Chemistry and Advanced Energy Materials, Key Laboratory of Green Chemical Media and Reactions, Ministry of Education, Collaborative Innovation Center of Henan Province for Green Manufacturing of Fine Chemicals, Henan Normal University, Xinxiang, Henan 453007, China.*

<sup>b</sup>*College of Chemistry and Molecular Engineering, Zhengzhou University, Zhengzhou, Henan 450001, China*

\*Corresponding author. Tel: +1186 373 3328950; fax: +1186 373 3326336.

E-mail address: xnchen@htu.edu.cn; qyzhao@htu.edu.cn.

#### **General Methods**

All manipulations were carried out under N<sub>2</sub> atmosphere by means of standard Schlenk techniques, unless otherwise stated. Solvents were dried and degassed using standard procedures prior to use. NiCl<sub>2</sub>(PPh<sub>3</sub>)<sub>2</sub>, Ni(acac)<sub>2</sub> and pyrazoles were used as received from commercial sources without further purification. All NMR spectra were recorded on a Bruker AV400 (<sup>1</sup>H 400.1 MHz; <sup>13</sup>C 100.6 MHz; <sup>11</sup>B 128.0 MHz) or a Bruker AV600 (<sup>1</sup>H 600.2 MHz; <sup>13</sup>C 150.9 MHz; <sup>11</sup>B 192.6 MHz) spectrometer. <sup>1</sup>H and <sup>13</sup>C NMR chemical shifts are referenced to residual solvent protons or TMS, and <sup>11</sup>B NMR spectra are externally referenced to BF<sub>3</sub>·OEt<sub>2</sub> in C<sub>6</sub>D<sub>6</sub> (δ = 0.00 ppm). Elemental analyses data were obtained on a Elementar (Vario EL) instrument.

#### **1. Preparation and Characterization of Compounds 1a-1d, 2a, 2b, 3, 4 and 5**

General synthetic method for **1a-1d**: To a stirred mixture of 9-BBN dimer (0.73 g, 3 mmol) and KH (0.24 g, 6 mmol) in 30 mL toluene was slowly added into a 20 mL toluene solution of pyrazole (12 mmol) using a syringe. Hydrogen evolution was immediately observed. The reaction mixture was refluxed for 3 h until no more gas was released. During reaction a white precipitate was formed. The mixture was cooled to room temperature, and

the solvent was removed to produce a white solid which was washed with hexane and dried under vacuum.

Compound **1a**. Yield: 1.73 g, 98%.

$^1\text{H}$  NMR(400 MHz,  $\text{CD}_3\text{CN}$ ):  $\delta$  7.5 (d,  $J = 2.0$  Hz, 2H), 7.3 (d,  $J = 1.2$  Hz, 2H), 6.0 (t,  $J = 1.8$  Hz, 2H), 1.9-1.8 (m, 2H), 1.8-1.7 (m, 4H), 1.7-1.6 (m, 4H), 1.5 (br, 2H), 1.2 (m, 2H).  $^{13}\text{C}\{^1\text{H}\}$  NMR (101 MHz,  $\text{CD}_3\text{CN}$ ):  $\delta$  138.1, 131.1, 102.3, 31.3, 24.4.  $^{11}\text{B}$  NMR (128 MHz,  $\text{CD}_3\text{CN}$ ):  $\delta$  -0.1 (s).

Compound **1b**. Yield: 1.88 g, 97%.

$^1\text{H}$  NMR(600 MHz,  $\text{CD}_3\text{CN}$ ):  $\delta$  7.4 (s, 2H), 5.7 (s, 2H), 2.1 (s, 6H), 1.9-1.7 (m, 6H), 1.6 (m, 4H), 1.4 (br, 2H), 1.3 (m, 2H).  $^{13}\text{C}\{^1\text{H}\}$  NMR (151 MHz,  $\text{CD}_3\text{CN}$ ):  $\delta$  146.2, 132.2, 102.3, 32.0, 25.2, 24.2, 13.5.  $^{11}\text{B}$  NMR (193 MHz,  $\text{CD}_3\text{CN}$ ):  $\delta$  -2.1 (s).

Compound **1c**. Yield: 2.77 g, 96%.

$^1\text{H}$  NMR (600 MHz,  $\text{CD}_3\text{CN}$ ):  $\delta$  7.4 (s, 2H), 1.8 (m, 2H), 1.7 (m, 4H), 1.6 (m, 4H), 1.4 (br, 2H), 1.2 (m, 2H).  $^{13}\text{C}\{^1\text{H}\}$  NMR (151 MHz,  $\text{CD}_3\text{CN}$ ):  $\delta$  144.7, 132.3, 90.4, 31.8, 25.0, 23.2, 11.8.  $^{11}\text{B}$  NMR (193 MHz,  $\text{CD}_3\text{CN}$ ):  $\delta$  -0.5 (s).

Compound **1d**. Yield: 2.22 g, 98%.

$^1\text{H}$  NMR(600 MHz,  $\text{CD}_3\text{CN}$ ):  $\delta$  7.4 (s, 2H), 5.8 (s, 2H), 2.9 (Hept,  $J = 6.6$  Hz, 2H), 1.9-1.7 (m, 6H), 1.6-1.5 (m, 4H), 1.4 (br, 2H), 1.2 (d,  $J = 6.6$  Hz, 1H), 1.2 (d,  $J = 6.6$  Hz, 1H), 1.1 (d,  $J = 6.6$  Hz, 12H).  $^{13}\text{C}\{^1\text{H}\}$  NMR (151 MHz,  $\text{CD}_3\text{CN}$ ):  $\delta$  157.9, 132.1, 98.9, 32.2, 28.6, 25.3, 24.7, 24.0.  $^{11}\text{B}$  NMR (193 MHz,  $\text{CD}_3\text{CN}$ ):  $\delta$  -1.9 (s).

Compound **2a**. At room temperature, a slurry of **1a** (0.29 g, 1 mmol) with  $\text{Ni}(\text{acac})_2$  (0.13 g, 0.5 mmol) in 50 mL dichloromethane was stirred vigorously for 12 h. The solution gradually turned from light-green to orange-red, and a little white precipitation was generated. Then the mixture was filtered to remove the insoluble substance. After concentration of the filtrate to saturation, orange crystals were obtained after a few days, which were collected by filtration and dried under vacuum. Yield: 0.20 g, 70%.

$^1\text{H}$  NMR plus  $^{13}\text{C}$ - $^1\text{H}$  HSQC (600 MHz,  $\text{C}_6\text{D}_6$ ):  $\delta$  7.6 (d,  $J = 2.3$  Hz, 2H), 7.1 (s, 1H), 6.9 (d,  $J = 2.1$  Hz, 2H), 6.0 (t,  $J = 2.2$  Hz, 2H), 2.3-2.0 (m, 6H), 2.0-1.9 (m, 2H), 1.8 (dt,  $J = 12.1, 6.8$  Hz, 2H), 1.6 (dt,  $J = 13.8, 6.5$  Hz, 2H), 1.4 (s, 1H).  $^{13}\text{C}\{^1\text{H}\}$  NMR (151 MHz,  $\text{C}_6\text{D}_6$ ):  $\delta$  141.3, 135.2, 105.5, 32.5, 31.3, 30.6, 24.6, 20.4.  $^{11}\text{B}$  NMR (193 MHz,  $\text{C}_6\text{D}_6$ ):  $\delta$  0.8 (s). Elemental Analysis Calcd. (%) for  $\text{C}_{28}\text{H}_{40}\text{B}_2\text{N}_8\text{Ni}$ : C, 59.11; H, 7.09; N, 19.70. Found: C,

59.40; H, 7.28; N, 19.63.

Compound **3**. At room temperature, a slurry of **1b** (0.64 g, 2 mmol) with NiCl<sub>2</sub>(PPh<sub>3</sub>)<sub>2</sub> (0.65 g, 1 mmol) or Ni(acac)<sub>2</sub> (0.26 g, 1 mmol) in 50 mL dichloromethane or toluene was stirred vigorously for 12 h. The solution gradually turned from dark- or light-green to green, and a little white precipitation was generated. Then the mixture was filtered to remove the insoluble substance. The filtrate was removed solvent under vacuum and redissolved in n-hexane. After concentration of the solution to near saturation, green crystals were obtained after a few days, which were collected by filtration and dried under vacuum. Yield: 0.59 g, 95%. Elemental Analysis Calcd. (%) for C<sub>32</sub>H<sub>48</sub>B<sub>2</sub>N<sub>8</sub>Ni: C, 61.49; H, 7.74; N, 17.93. Found: C, 61.31; H, 8.02; N, 18.05.

Compound **2b**. A solution of **3** (1.25 g, 2 mmol) in 30 mL toluene was stirred under reflux for 3 days. The solution gradually turned from green to orange-red. After concentration of the reaction mixture to saturation, orange crystals were obtained after a few days, which were collected by filtration and dried under vacuum. Yield: 0.81 g, 65%. Elemental Analysis Calcd. (%) for C<sub>32</sub>H<sub>48</sub>B<sub>2</sub>N<sub>8</sub>Ni: C, 61.49; H, 7.74; N, 17.93. Found: C, 61.70; H, 7.95; N, 17.65.

Compound **4**. At room temperature, a slurry of **1c** (0.96 g, 2 mmol) with NiCl<sub>2</sub>(PPh<sub>3</sub>)<sub>2</sub> (0.65 g, 1 mmol) or Ni(acac)<sub>2</sub> (0.26 g, 1 mmol) in 50 mL toluene was stirred vigorously for 12 h. The solution gradually turned from dark- or light-green to green, and a little white precipitation was generated. Then the mixture was filtered to remove the insoluble substance. The filtrate was removed solvent under vacuum and redissolved in n-hexane. After concentration of the solution to near saturation, green crystals were obtained after a few days, which were collected by filtration and dried under vacuum. Yield: 0.82 g, 87%. Elemental Analysis Calcd. (%) for C<sub>32</sub>H<sub>44</sub>B<sub>2</sub>N<sub>8</sub>Br<sub>4</sub>Ni: C, 40.86; H, 4.71; N, 11.91. Found: C, 40.56; H, 5.08; N, 12.25.

Compound **5**. At room temperature, a slurry of **1d** (0.76 g, 2 mmol) with NiCl<sub>2</sub>(PPh<sub>3</sub>)<sub>2</sub> (0.65 g, 1 mmol) in 50 mL toluene or CH<sub>2</sub>Cl<sub>2</sub> was stirred vigorously for 12 h. The solution gradually turned from dark-green to blue-green, and a little white precipitation was generated. Then the mixture was filtered to remove the insoluble substance. The filtrate was removed solvent under vacuum and redissolved in n-hexane. After concentration of the solution to near saturation, blue-green crystals were obtained via fast crystallization within one day, which

were collected by filtration and dried under vacuum. Yield: 0.68 g, 90%. Elemental Analysis Calcd. (%) for C<sub>40</sub>H<sub>66</sub>B<sub>2</sub>N<sub>8</sub>NiO: C, 40.86; H, 4.71; N, 11.91. Found: C, 41.13; H, 4.96; N, 11.63.

## 2. X-ray Crystallography

Single-crystal X-ray diffraction data were collected on a Bruker SMART6000 CCD detector with graphite-monochromated Mo K $\alpha$  radiation ( $\lambda = 0.71073 \text{ \AA}$ ), or on an Agilent Diffraction SuperNova Atlas using Mo K $\alpha$  radiation ( $\lambda = 0.71073 \text{ \AA}$ ) or Cu K $\alpha$  radiation ( $\lambda = 1.54184 \text{ \AA}$ ). Data reduction were performed using the SAINT software package and an absorption correction was applied using SADABS.<sup>[1-4]</sup> The data were corrected for decay, Lorentz, and polarization effects as well as absorption and beam corrections based on the multi-scan technique. The structures were solved by a combination of direct methods in SHELXT and the difference Fourier technique and refined by full-matrix least-squares procedures. Non-hydrogen atoms were refined with anisotropic displacement parameters. The H-atoms were either located or calculated and subsequently treated with a riding model. CCDC-1917928 (**2a**), CCDC-1917929 (**2b**), CCDC-1917930 (**3**), CCDC-1917931 (**4**) and CCDC-1917932 (**5**) contain the supplementary crystallographic data for this paper. These data can be obtained free of charge from The Cambridge Crystallographic Data Centre via [www.ccdc.cam.ac.uk/data-request/cif](http://www.ccdc.cam.ac.uk/data-request/cif). Crystal data and refinement parameters are summarized in Table S1. The X-ray crystal structure of **2b** is shown in Fig. S1.

**Table S1.** Crystallographic data and structure refinement results for **2a**, **2b**, **3**, **4** and **5**.

|                   | <b>2a</b>                                                        | <b>2b</b>                                                        | <b>3</b>                                                         | <b>4•0.5C<sub>6</sub>H<sub>14</sub></b>                                          | <b>5</b>                                                          |
|-------------------|------------------------------------------------------------------|------------------------------------------------------------------|------------------------------------------------------------------|----------------------------------------------------------------------------------|-------------------------------------------------------------------|
| Empirical formula | C <sub>28</sub> H <sub>40</sub> B <sub>2</sub> N <sub>8</sub> Ni | C <sub>32</sub> H <sub>48</sub> B <sub>2</sub> N <sub>8</sub> Ni | C <sub>32</sub> H <sub>48</sub> B <sub>2</sub> N <sub>8</sub> Ni | C <sub>35</sub> H <sub>51</sub> B <sub>2</sub> Br <sub>4</sub> N <sub>8</sub> Ni | C <sub>40</sub> H <sub>66</sub> B <sub>2</sub> N <sub>8</sub> NiO |
| <i>Mr</i>         | 569.01                                                           | 625.11                                                           | 625.11                                                           | 983.80                                                                           | 754.33                                                            |
| Temp, K           | 113.15                                                           | 295.2(4)                                                         | 293.99(18)                                                       | 170.00(10)                                                                       | 100.01(10)                                                        |
| Crystal system    | Triclinic                                                        | Triclinic                                                        | Monoclinic                                                       | Monoclinic                                                                       | Monoclinic                                                        |
| Space group       | <i>P</i> -1                                                      | <i>P</i> -1                                                      | <i>P</i> 2 <sub>1</sub> / <i>n</i>                               | <i>P</i> 2 <sub>1</sub> / <i>n</i>                                               | <i>P</i> 2 <sub>1</sub> / <i>c</i>                                |

|                                         |               |               |               |               |               |
|-----------------------------------------|---------------|---------------|---------------|---------------|---------------|
| $a[\text{Å}]$                           | 7.5258(2)     | 7.5038(5)     | 8.8173(4)     | 11.1521(2)    | 11.00180(10)  |
| $b[\text{Å}]$                           | 9.3230(3)     | 9.7847(5)     | 24.0412(10)   | 19.2678(3)    | 10.8736(2)    |
| $c[\text{Å}]$                           | 10.6602(4)    | 11.3835(6)    | 15.2894(9)    | 18.7249(2)    | 34.0677(3)    |
| $\alpha[^\circ]$                        | 89.771(2)     | 87.799(4)     | 90            | 90            | 90            |
| $\beta[^\circ]$                         | 80.615(2)     | 79.365(5)     | 96.950(4)     | 102.2210(10)  | 90.9030(10)   |
| $\gamma[^\circ]$                        | 66.6289(18)   | 68.035(6)     | 90            | 90            | 90            |
| $V[\text{Å}^3]$                         | 675.87(4)     | 761.39(8)     | 3217.2(3)     | 3932.36(10)   | 4074.99(9)    |
| $Z$                                     | 1             | 1             | 4             | 4             | 4             |
| $\rho_{\text{calc}} [\text{g cm}^{-3}]$ | 1.398         | 1.363         | 1.291         | 1.662         | 1.230         |
| $\lambda [\text{Å}]$                    | 0.71073       | 1.54184       | 0.71073       | 1.54184       | 1.54184       |
| $\mu [\text{mm}^{-1}]$                  | 0.753         | 1.200         | 0.639         | 5.758         | 0.998         |
| $F(000)$                                | 302.0         | 334.0         | 1336.0        | 1980.0        | 1628.0        |
| $\theta$ range $[^\circ]$               | 2.97 to 36.47 | 3.95 to 72.53 | 3.39 to 25.00 | 4.26 to 71.26 | 4.02 to 72.34 |
| Reflns collected                        | 38704         | 7107          | 15648         | 18596         | 22863         |
| Independent                             | 6616          | 2935          | 5657          | 7491          | 7846          |
| reflns                                  |               |               |               |               |               |
| $R_{\text{int}}$                        | 0.0618        | 0.0248        | 0.0351        | 0.0246        | 0.0508        |
| GOF on $F^2$                            | 1.052         | 1.030         | 1.041         | 1.079         | 1.018         |
| $R_1/wR_2 [I \geq 2\sigma(I)]$          | 0.0350/0.0821 | 0.0464/0.1178 | 0.0449/0.1013 | 0.0382/0.0923 | 0.0621/0.1687 |
| $R_1/wR_2$ (all data)                   | 0.0479/0.0882 | 0.0542/0.1239 | 0.0601/0.1082 | 0.0436/0.0955 | 0.0901/0.1869 |

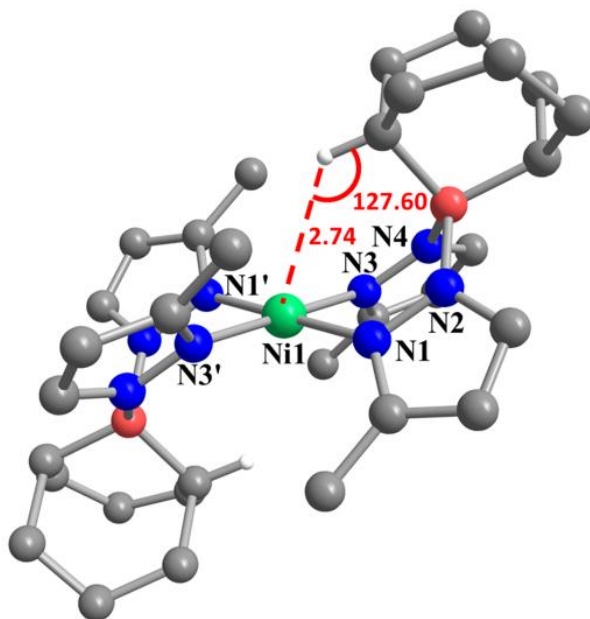

**Fig. S1** X-ray crystal structure of **2b**. Most hydrogen atoms on pyrazole and BBN rings are omitted for clarity. Selected bond lengths (Å) and angles (°): Ni1–N1, 1.9170(19); Ni1–N3, 1.9128(19); N1–Ni1–N3, 87.55(8).

### 3. Cartesian coordinates of calculated compounds

#### Compound 3

|    |             |             |             |
|----|-------------|-------------|-------------|
| Ni | -0.10782200 | 0.31283800  | 0.07691800  |
| N  | -1.51606500 | 1.45635700  | -0.90563300 |
| N  | 1.43497300  | 1.53148500  | 0.70867600  |
| N  | -2.82130000 | 1.10542100  | -0.71078500 |
| N  | 2.29043700  | -0.18923500 | -1.58686000 |
| N  | 0.92411300  | -0.19042000 | -1.62688800 |
| N  | 2.71098200  | 1.09447600  | 0.48418200  |
| N  | -2.63105900 | 0.11230200  | 1.54370500  |
| N  | -1.28744600 | 0.20108700  | 1.79135000  |
| C  | 1.50632500  | 2.80270100  | 1.15691600  |
| C  | -2.33695800 | -1.49701000 | -0.52661400 |
| H  | -1.23231300 | -1.35353700 | -0.57082200 |
| C  | -1.49892800 | 2.62716900  | -1.57752500 |
| C  | -4.71948200 | -0.65439300 | 0.04629200  |

|   |             |             |             |
|---|-------------|-------------|-------------|
| H | -5.38558700 | 0.13369600  | 0.43850000  |
| C | 2.85207800  | 3.19625100  | 1.21056700  |
| H | 3.24316100  | 4.15162400  | 1.53010600  |
| C | 2.77036600  | 0.05747100  | -2.83439900 |
| C | -3.61362400 | 2.06065700  | -1.22995500 |
| H | -4.68805700 | 1.98156000  | -1.16304600 |
| C | 0.55456800  | 0.00380300  | -2.90046900 |
| H | -0.49314900 | 0.04559200  | -3.15846600 |
| C | -2.76607200 | -1.71739400 | -1.99822100 |
| H | -2.44798800 | -0.84034000 | -2.57812100 |
| H | -2.23438600 | -2.57830000 | -2.43002900 |
| C | 5.04807100  | -0.93335000 | 1.30664700  |
| H | 6.06688300  | -1.34931100 | 1.28622200  |
| H | 5.15476700  | 0.08910800  | 1.69137700  |
| C | 3.56918900  | 2.08983800  | 0.77299600  |
| H | 4.63294100  | 1.95069000  | 0.65020400  |
| C | -1.14354900 | 0.53184300  | 3.09568100  |
| C | 4.48168500  | -0.87286700 | -0.13819800 |
| H | 5.15912200  | -0.21105200 | -0.69885900 |
| C | 1.68188500  | 0.15694700  | -3.70385800 |
| H | 1.72270000  | 0.33197500  | -4.76954200 |
| C | -2.81883600 | 3.04785500  | -1.79806900 |
| H | -3.14326900 | 3.94318700  | -2.30885500 |
| C | -0.23393600 | 3.28870600  | -2.03629800 |
| H | 0.59901600  | 3.09060000  | -1.35872000 |
| H | -0.37680400 | 4.37185500  | -2.10643900 |
| H | 0.06238900  | 2.92620800  | -3.02820100 |
| C | -4.28330200 | -1.90594600 | -2.21245600 |
| H | -4.50425900 | -1.80102600 | -3.28370800 |
| H | -4.56398800 | -2.93249500 | -1.96030600 |
| C | 2.12728200  | -1.46924100 | 0.74120200  |

|   |             |             |             |
|---|-------------|-------------|-------------|
| H | 1.04052200  | -1.24413800 | 0.86904100  |
| C | -2.40790900 | 0.67975700  | 3.68095600  |
| H | -2.62502800 | 0.93154000  | 4.70911200  |
| C | -5.16401000 | -0.91404900 | -1.42077900 |
| H | -6.20288900 | -1.27726300 | -1.43278800 |
| H | -5.17820200 | 0.03737000  | -1.96643500 |
| C | -3.31145600 | 0.41257600  | 2.66255300  |
| H | -4.39095200 | 0.41592900  | 2.66590000  |
| C | 0.29136300  | 3.58628100  | 1.55636900  |
| H | 0.12731300  | 3.53647900  | 2.64000400  |
| H | -0.60979000 | 3.20792700  | 1.06874800  |
| H | 0.41263000  | 4.64194300  | 1.29194000  |
| C | 2.16914000  | -2.83931000 | 0.02535900  |
| H | 1.64404500  | -3.60015300 | 0.62214300  |
| H | 1.60942600  | -2.74883700 | -0.91466300 |
| C | -2.53652900 | -2.72677800 | 0.39358200  |
| H | -2.04885100 | -2.50988800 | 1.35333800  |
| H | -2.01566200 | -3.60272400 | -0.02121300 |
| C | 3.59300500  | -3.34671200 | -0.29053800 |
| H | 4.02702700  | -3.80597200 | 0.60227100  |
| H | 3.52359700  | -4.15924200 | -1.02686700 |
| C | 2.68380600  | -1.49118300 | 2.18772500  |
| H | 2.46232000  | -0.52114600 | 2.64639400  |
| H | 2.14881700  | -2.24289700 | 2.78810400  |
| C | -4.94604000 | -1.90735400 | 0.93998400  |
| H | -4.82618900 | -1.62160700 | 1.99165800  |
| H | -5.98897800 | -2.24547700 | 0.84279800  |
| B | 2.93719700  | -0.35145300 | -0.13761400 |
| B | -3.14877900 | -0.22354600 | 0.09006000  |
| C | 4.54334100  | -2.26086000 | -0.84174200 |
| H | 4.30308400  | -2.12871500 | -1.90287500 |



|   |             |             |             |
|---|-------------|-------------|-------------|
| H | 5.57440300  | -2.64523900 | -0.81249900 |
| C | -4.01020700 | -3.10600900 | 0.66065100  |
| H | -4.39587500 | -3.68514100 | -0.18357100 |
| H | -4.04758500 | -3.79076500 | 1.51906500  |
| C | 0.17636600  | 0.64214100  | 3.79536400  |
| H | 0.54715400  | -0.34539200 | 4.09419800  |
| H | 0.06463400  | 1.24072900  | 4.70505300  |
| H | 0.93947400  | 1.10244400  | 3.16671700  |
| C | 4.20098200  | -1.73854700 | 2.31283000  |
| H | 4.41442300  | -2.80585700 | 2.20900700  |
| H | 4.51595300  | -1.48010000 | 3.33345800  |
| C | 4.20851000  | 0.29133900  | -3.19315400 |
| H | 4.64652500  | 1.08926500  | -2.58427300 |
| H | 4.26301100  | 0.60189200  | -4.24063300 |
| H | 4.83619400  | -0.59575500 | -3.07498800 |

**Compound 2b**

|    |            |             |             |
|----|------------|-------------|-------------|
| Ni | 0.00001300 | 0.00000500  | -0.00004800 |
| N  | 2.43434600 | 1.21452100  | 1.06181900  |
| N  | 1.07254600 | -1.33783900 | 0.92912900  |
| N  | 1.07239200 | 1.33768100  | 0.92950300  |
| N  | 2.43436400 | -1.21413200 | 1.06221700  |
| C  | 0.67318500 | -2.34895400 | 1.73796600  |
| C  | 0.67319100 | 2.34914600  | 1.73796400  |
| C  | 1.78703200 | -2.87882800 | 2.39581000  |
| H  | 1.79450500 | -3.69270600 | 3.10600900  |
| C  | 2.86207900 | 2.12741000  | 1.95196300  |
| H  | 3.90108300 | 2.17938300  | 2.22976200  |
| C  | 2.86184500 | -2.12624800 | 1.95327100  |
| H  | 3.90071600 | -2.17772600 | 2.23168100  |
| C  | 1.78728200 | 2.87988500  | 2.39470400  |

|   |             |             |             |
|---|-------------|-------------|-------------|
| H | 1.79490500  | 3.69416300  | 3.10444200  |
| C | 4.83893900  | 0.00010900  | 0.83289100  |
| H | 4.98650600  | 0.00036900  | 1.92669200  |
| C | 3.25098800  | -0.00021000 | -1.20794500 |
| H | 2.22746500  | -0.00025900 | -1.62199200 |
| C | 5.55981700  | 1.26936900  | 0.28748200  |
| H | 5.22045700  | 2.15757600  | 0.83066700  |
| H | 6.63642800  | 1.19279900  | 0.50266900  |
| C | -0.74236200 | 2.79226800  | 1.92169000  |
| H | -1.21123200 | 3.08558800  | 0.97939400  |
| H | -0.76511900 | 3.65047100  | 2.59990200  |
| H | -1.35432000 | 2.00153100  | 2.36346900  |
| C | -0.74231900 | -2.79255900 | 1.92092900  |
| H | -1.35455400 | -2.00235100 | 2.36328200  |
| H | -0.76507200 | -3.65137200 | 2.59836900  |
| H | -1.21088600 | -3.08511900 | 0.97825100  |
| C | 3.93231700  | 1.29688700  | -1.72042600 |
| H | 3.93214100  | 1.31943700  | -2.82149900 |
| H | 3.32317400  | 2.14944600  | -1.39997800 |
| C | 5.36988200  | 1.54275300  | -1.22032100 |
| H | 6.07644800  | 0.94462500  | -1.80124900 |
| H | 5.64164400  | 2.58736200  | -1.42694000 |
| B | 3.24709900  | 0.00006600  | 0.41888600  |
| C | 5.55958100  | -1.26953500 | 0.28806700  |
| H | 6.63617600  | -1.19319900 | 0.50341600  |
| H | 5.21985400  | -2.15747800 | 0.83146000  |
| C | 5.36981000  | -1.54329100 | -1.21966400 |
| H | 5.64158700  | -2.58795200 | -1.42601300 |
| H | 6.07645200  | -0.94530600 | -1.80064000 |
| C | 3.93230300  | -1.29751800 | -1.71997100 |
| H | 3.32308200  | -2.14993900 | -1.39931200 |

|   |             |             |             |
|---|-------------|-------------|-------------|
| H | 3.93221100  | -1.32040000 | -2.82103800 |
| N | -2.43435500 | -1.21450400 | -1.06180700 |
| N | -1.07253500 | 1.33781500  | -0.92926100 |
| N | -1.07240800 | -1.33771300 | -0.92947900 |
| N | -2.43437400 | 1.21415900  | -1.06220000 |
| C | -0.67323500 | 2.34889300  | -1.73817500 |
| C | -0.67323100 | -2.34918500 | -1.73793400 |
| C | -1.78715700 | 2.87886200  | -2.39582400 |
| H | -1.79468500 | 3.69273500  | -3.10602700 |
| C | -2.86209500 | -2.12732600 | -1.95201900 |
| H | -3.90109300 | -2.17924100 | -2.22985200 |
| C | -2.86196200 | 2.12639200  | -1.95308100 |
| H | -3.90088000 | 2.17796500  | -2.23129600 |
| C | -1.78731900 | -2.87983900 | -2.39474900 |
| H | -1.79495200 | -3.69409700 | -3.10451000 |
| C | -4.83892600 | -0.00010600 | -0.83281400 |
| H | -4.98653100 | -0.00036900 | -1.92660900 |
| C | -3.25091000 | 0.00024400  | 1.20798000  |
| H | -2.22737700 | 0.00031600  | 1.62199900  |
| C | -5.55977100 | -1.26936200 | -0.28736900 |
| H | -5.22041200 | -2.15757700 | -0.83054100 |
| H | -6.63638700 | -1.19280600 | -0.50253300 |
| C | 0.74230900  | -2.79240000 | -1.92153200 |
| H | 1.21112300  | -3.08558300 | -0.97916400 |
| H | 0.76506500  | -3.65070700 | -2.59961200 |
| H | 1.35432300  | -2.00175500 | -2.36340100 |
| C | 0.74226500  | 2.79239400  | -1.92141600 |
| H | 1.35440500  | 2.00205200  | -2.36366400 |
| H | 0.76496700  | 3.65104400  | -2.59906600 |
| H | 1.21097100  | 3.08516100  | -0.97887300 |
| C | -3.93221900 | -1.29683900 | 1.72050100  |

|   |             |             |             |
|---|-------------|-------------|-------------|
| H | -3.93201800 | -1.31934900 | 2.82157400  |
| H | -3.32307600 | -2.14940700 | 1.40006600  |
| C | -5.36980300 | -1.54269700 | 1.22043900  |
| H | -6.07634800 | -0.94453800 | 1.80136300  |
| H | -5.64157200 | -2.58729700 | 1.42709700  |
| B | -3.24707900 | -0.00005200 | -0.41884800 |
| C | -5.55956600 | 1.26952400  | -0.28797000 |
| H | -6.63616300 | 1.19316500  | -0.50329600 |
| H | -5.21986400 | 2.15747400  | -0.83137200 |
| C | -5.36976900 | 1.54325800  | 1.21976200  |
| H | -5.64157700 | 2.58790600  | 1.42613300  |
| H | -6.07636700 | 0.94523300  | 1.80075300  |
| C | -3.93223800 | 1.29753800  | 1.72001700  |
| H | -3.32305600 | 2.14997300  | 1.39931900  |
| H | -3.93210500 | 1.32043300  | 2.82108300  |

**Compound 4**

|    |             |             |             |
|----|-------------|-------------|-------------|
| Ni | 0.00004200  | 0.00001500  | 0.00013900  |
| N  | -2.65263000 | -1.21320500 | -0.08568800 |
| N  | -1.37007400 | 1.33774300  | 0.38908900  |
| N  | -1.37015900 | -1.33765900 | 0.38899700  |
| N  | -2.65256600 | 1.21337500  | -0.08556300 |
| C  | -1.35330100 | 2.34411000  | 1.29615700  |
| C  | -1.35346500 | -2.34409600 | 1.29599000  |
| C  | -2.65027400 | 2.86149600  | 1.39577600  |
| C  | -3.43178100 | -2.11796300 | 0.52910700  |
| H  | -4.48794800 | -2.18266900 | 0.33488000  |
| C  | -3.43167100 | 2.11805700  | 0.52940400  |
| H  | -4.48785200 | 2.18278600  | 0.33526900  |
| C  | -2.65045000 | -2.86148200 | 1.39546900  |
| C  | -4.71893300 | 0.00016300  | -1.33648900 |

|   |             |             |             |
|---|-------------|-------------|-------------|
| H | -5.32656500 | 0.00018100  | -0.41519500 |
| C | -2.40166900 | 0.00016000  | -2.48697100 |
| H | -1.29911700 | 0.00015800  | -2.41756000 |
| C | -5.13246000 | -1.26919300 | -2.14032900 |
| H | -5.06730300 | -2.15802800 | -1.50372600 |
| H | -6.19481300 | -1.18905200 | -2.41402700 |
| C | -0.15900600 | -2.78607600 | 2.07144700  |
| H | 0.68134000  | -3.03413600 | 1.42024100  |
| H | -0.41941100 | -3.67084800 | 2.65736000  |
| H | 0.17179000  | -2.00866300 | 2.76525100  |
| C | -0.15878800 | 2.78599300  | 2.07159200  |
| H | 0.17185200  | 2.00861900  | 2.76552200  |
| H | -0.41905800 | 3.67089000  | 2.65737700  |
| H | 0.68162000  | 3.03381100  | 1.42038200  |
| C | -2.79439900 | -1.29780300 | -3.24263100 |
| H | -2.31559400 | -1.32112500 | -4.23363100 |
| H | -2.38521400 | -2.15035200 | -2.68921300 |
| C | -4.30650100 | -1.54388000 | -3.41595200 |
| H | -4.69053800 | -0.94666400 | -4.24658800 |
| H | -4.46057000 | -2.58860800 | -3.71859300 |
| B | -3.10821600 | 0.00014000  | -1.02281900 |
| C | -5.13248200 | 1.26947000  | -2.14040800 |
| H | -6.19481900 | 1.18926500  | -2.41414700 |
| H | -5.06739900 | 2.15834000  | -1.50385200 |
| C | -4.30649400 | 1.54414900  | -3.41601000 |
| H | -4.46058600 | 2.58886400  | -3.71868300 |
| H | -4.69048200 | 0.94689800  | -4.24664300 |
| C | -2.79439500 | 1.29812600  | -3.24262200 |
| H | -2.38525900 | 2.15067700  | -2.68917100 |
| H | -2.31554700 | 1.32147600  | -4.23360100 |
| N | 2.65270200  | 1.21327200  | 0.08559100  |

|   |             |             |             |
|---|-------------|-------------|-------------|
| N | 1.37017700  | -1.33767900 | -0.38884900 |
| N | 1.37017800  | 1.33767000  | -0.38896800 |
| N | 2.65268800  | -1.21326100 | 0.08574400  |
| C | 1.35338000  | -2.34408100 | -1.29587400 |
| C | 1.35336500  | 2.34397900  | -1.29609700 |
| C | 2.65035400  | -2.86145600 | -1.39551800 |
| C | 3.43180700  | 2.11782300  | -0.52957400 |
| H | 4.48801800  | 2.18247400  | -0.33559900 |
| C | 3.43178600  | -2.11793700 | -0.52924500 |
| H | 4.48798300  | -2.18261300 | -0.33519000 |
| C | 2.65035600  | 2.86128100  | -1.39588300 |
| C | 4.71904400  | 0.00005900  | 1.33667800  |
| H | 5.32673300  | 0.00003300  | 0.41542100  |
| C | 2.40172400  | 0.00012900  | 2.48701400  |
| H | 1.29917800  | 0.00014800  | 2.41753500  |
| C | 5.13258100  | 1.26938900  | 2.14058400  |
| H | 5.06762200  | 2.15823300  | 1.50398500  |
| H | 6.19488600  | 1.18914200  | 2.41443500  |
| C | 0.15878800  | 2.78586700  | -2.07143100 |
| H | -0.68148300 | 3.03392800  | -1.42013200 |
| H | 0.41908200  | 3.67061500  | -2.65743100 |
| H | -0.17207000 | 2.00840000  | -2.76515000 |
| C | 0.15883300  | -2.78600800 | -2.07123000 |
| H | -0.17193100 | -2.00861600 | -2.76508000 |
| H | 0.41911800  | -3.67085000 | -2.65709100 |
| H | -0.68149700 | -3.03393100 | -1.41995700 |
| C | 2.79440600  | 1.29812400  | 3.24264700  |
| H | 2.31551700  | 1.32149700  | 4.23360600  |
| H | 2.38526900  | 2.15064900  | 2.68915700  |
| C | 4.30648900  | 1.54421600  | 3.41608700  |
| H | 4.69044400  | 0.94710400  | 4.24683000  |

|    |             |             |             |
|----|-------------|-------------|-------------|
| H  | 4.46052900  | 2.58897800  | 3.71862500  |
| B  | 3.10833200  | 0.00006100  | 1.02289500  |
| C  | 5.13253500  | -1.26926000 | 2.14061300  |
| H  | 6.19485200  | -1.18906100 | 2.41443600  |
| H  | 5.06750900  | -2.15811900 | 1.50403900  |
| C  | 4.30645100  | -1.54398800 | 3.41614500  |
| H  | 4.46044900  | -2.58874200 | 3.71873100  |
| H  | 4.69044600  | -0.94685400 | 4.24685500  |
| C  | 2.79437400  | -1.29783700 | 3.24272100  |
| H  | 2.38520200  | -2.15038000 | 2.68928500  |
| H  | 2.31550100  | -1.32113900 | 4.23368900  |
| Br | -3.23883600 | 4.27473200  | 2.49134400  |
| Br | 3.23889200  | -4.27473400 | -2.49104500 |
| Br | 3.23889400  | 4.27440000  | -2.49161500 |
| Br | -3.23909600 | -4.27483000 | 2.49084800  |

**Compound 4'**

|    |             |             |             |
|----|-------------|-------------|-------------|
| Ni | -0.00004300 | -0.00058200 | -0.40726100 |
| N  | -1.04528000 | 1.33661000  | 0.75744600  |
| N  | 1.04523500  | -1.33813700 | 0.75665800  |
| N  | -2.25906000 | 1.73252800  | 0.27022200  |
| N  | 2.88499000  | 0.37358400  | -0.83760300 |
| N  | 1.76646600  | 1.14183100  | -0.66058800 |
| N  | 2.25947200  | -1.73287800 | 0.26959700  |
| N  | -2.88542900 | -0.37334400 | -0.83748600 |
| N  | -1.76709000 | -1.14201100 | -0.66129900 |
| C  | 0.89668500  | -1.85356600 | 1.99391200  |
| C  | -1.65321900 | 1.43517000  | -2.30996400 |
| H  | -0.62481700 | 1.06013500  | -2.07815000 |
| C  | -0.89637100 | 1.85198100  | 1.99470200  |
| C  | -4.13301300 | 1.83731300  | -1.67513500 |

|   |             |             |             |
|---|-------------|-------------|-------------|
| H | -4.96521700 | 1.72457000  | -0.95900000 |
| C | 2.05735500  | -2.57733300 | 2.30492400  |
| C | 3.98493800  | 1.11409200  | -0.62926500 |
| C | -2.88866200 | 2.47125700  | 1.20029200  |
| H | -3.87487200 | 2.87483300  | 1.03444300  |
| C | 2.17878300  | 2.39674500  | -0.36487300 |
| C | -1.46742200 | 2.95831800  | -2.52409400 |
| H | -1.01496900 | 3.37407200  | -1.61796400 |
| H | -0.74904600 | 3.14288600  | -3.33654400 |
| C | 3.94436600  | -3.36261000 | -1.89421700 |
| H | 4.86867400  | -3.79458700 | -2.30531700 |
| H | 3.79615300  | -3.85216500 | -0.92321700 |
| C | 2.88969800  | -2.47088800 | 1.19979400  |
| H | 3.87633800  | -2.87349300 | 1.03410200  |
| C | -2.17964200 | -2.39683500 | -0.36557200 |
| C | 4.13311100  | -1.83648600 | -1.67606300 |
| H | 4.96543600  | -1.72355800 | -0.96010600 |
| C | 3.58150200  | 2.40537300  | -0.33538400 |
| C | -2.05634000 | 2.57696200  | 2.30549000  |
| C | 0.34013400  | 1.69069600  | 2.81969500  |
| H | 1.05273300  | 1.01801500  | 2.33973100  |
| H | 0.09702400  | 1.29837200  | 3.81287800  |
| H | 0.82986400  | 2.66013800  | 2.96996900  |
| C | -2.76334600 | 3.74697400  | -2.80948100 |
| H | -2.55329200 | 4.81869000  | -2.69108100 |
| H | -3.05157500 | 3.62435900  | -3.85696300 |
| C | 1.65304200  | -1.43505700 | -2.31025600 |
| H | 0.62452800  | -1.06039100 | -2.07826800 |
| C | -3.58234500 | -2.40497300 | -0.33511600 |
| C | -3.94383900 | 3.36338900  | -1.89321200 |
| H | -4.86810900 | 3.79569400  | -2.30405200 |



|   |             |             |             |
|---|-------------|-------------|-------------|
| H | -3.79523300 | 3.85284000  | -0.92222000 |
| C | -3.98550100 | -1.11348300 | -0.62850400 |
| H | -4.97618500 | -0.69405100 | -0.69899500 |
| C | -0.34030800 | -1.69372200 | 2.81844100  |
| H | -0.83278200 | -2.66269500 | 2.96286100  |
| H | -1.05074100 | -1.01667600 | 2.34139900  |
| H | -0.09713100 | -1.30755000 | 3.81398900  |
| C | 2.08039300  | -0.66143000 | -3.58241400 |
| H | 1.36310200  | -0.84314300 | -4.39604200 |
| H | 2.02629300  | 0.41296500  | -3.36367500 |
| C | -2.08106200 | 0.66190200  | -3.58216500 |
| H | -2.02709800 | -0.41255000 | -3.36369600 |
| H | -1.36396500 | 0.84367900  | -4.39595300 |
| C | 3.50144100  | -0.99727500 | -4.08986100 |
| H | 3.46675400  | -1.91944200 | -4.67680600 |
| H | 3.81342200  | -0.21837800 | -4.79848900 |
| C | 1.46767700  | -2.95825100 | -2.52453500 |
| H | 1.01555100  | -3.37420600 | -1.61833100 |
| H | 0.74919200  | -3.14295400 | -3.33685000 |
| C | -4.57954500 | 1.12336800  | -2.98516400 |
| H | -4.93007900 | 0.11443700  | -2.73890900 |
| H | -5.45325600 | 1.64290400  | -3.40575600 |
| B | 2.75108700  | -1.16993900 | -1.13634100 |
| B | -2.75108800 | 1.17017700  | -1.13585500 |
| C | 4.57910400  | -1.12230800 | -2.98612500 |
| H | 4.92939500  | -0.11327700 | -2.73991700 |
| H | 5.45287500  | -1.64154800 | -3.40696100 |
| C | -3.50218600 | 0.99812700  | -4.08917500 |
| H | -3.46743400 | 1.92033900  | -4.67604900 |
| H | -3.81455700 | 0.21936700  | -4.79777900 |
| C | -1.29257700 | -3.58245400 | -0.16258800 |

|    |             |             |             |
|----|-------------|-------------|-------------|
| H  | -1.22788200 | -4.17753700 | -1.08160800 |
| H  | -1.71161200 | -4.23283700 | 0.61182100  |
| H  | -0.28491500 | -3.29245600 | 0.12606800  |
| C  | 2.76377800  | -3.74649200 | -2.81024600 |
| H  | 3.05173900  | -3.62374200 | -3.85778800 |
| H  | 2.55407400  | -4.81827600 | -2.69184900 |
| Br | 2.40027300  | -3.51939700 | 3.89838500  |
| Br | -4.69797200 | -3.88181500 | 0.01527800  |
| Br | -2.39844500 | 3.51937600  | 3.89892100  |
| Br | 4.69676100  | 3.88256600  | 0.01468100  |
| H  | 4.97572900  | 0.69503400  | -0.70045400 |
| C  | 1.29155000  | 3.58201800  | -0.16058600 |
| H  | 1.70994600  | 4.23108800  | 0.61528500  |
| H  | 1.22768500  | 4.17871000  | -1.07862700 |
| H  | 0.28366800  | 3.29153200  | 0.12674500  |

## References

- [1] *SADABS: Area-Detector Absorption Correction*, Bruker, Madison, Wisconsin, 2001.
- [2] *TWINABS*, Bruker, Madison, Wisconsin, 2001.
- [3] *SAINT: SAX Area-Detector Integration Program*, Bruker, Madison, Wisconsin, 2008.
- [4] *XPREP*, Bruker, Madison, Wisconsin, 2008.
